# Supplementary material for: Internet-Based Delivery of Evidence-Based Health Promotion Programs Among American Indian and Alaska Native Youth: A Case Study
Source: PubMed Central journal article supplement (PMC5138449; doi:10.2196/resprot.6017), 2016-11-21
Supplement: resprot_v5i4e225_app1.pdf [file resprot_v5i4e225_app1.pdf]

Multimedia Appendix 1. Engagement ratings for Internet-based health promotion programs among American Indian/Alaska Native youth (n=40-191): Alaska, Arizona, and Pacific Northwest, 2012-2014.

| Parameters                       | Native YG<br>(n=191) | Dangerous<br>Decibels<br>(n=62) | N-Squad<br>(n=62) | Aspire<br>(n=52) | Reconstructors<br>(n=45) | Lava<br>Mountain<br>(n=40) | Range of<br>agreement<br>across<br>programs<br>(%) |
|----------------------------------|----------------------|---------------------------------|-------------------|------------------|--------------------------|----------------------------|----------------------------------------------------|
|                                  | Agreed<br>(%)        | Agreed<br>(%)                   | Agreed<br>(%)     | Agreed<br>(%)    | Agreed<br>(%)            | Agreed<br>(%)              |                                                    |
| <b>Ease of use</b>               |                      |                                 |                   |                  |                          |                            |                                                    |
| Very easy or kind<br>of easy     | 91                   | 75                              | 72                | 90               | 68                       | 71                         | 68-91                                              |
| <b>Understandability</b>         |                      |                                 |                   |                  |                          |                            |                                                    |
| Words were<br>understandable     | 83                   | 60                              | 70                | 82               | 77                       | 73                         | 60-83                                              |
| Needed hints to<br>play the game | 33                   | 28                              | 28                | 16               | 40                       | 49                         | 16-49                                              |
| <b>Credibility</b>               |                      |                                 |                   |                  |                          |                            |                                                    |
| Information was<br>correct       | 90                   | 65                              | 64                | 80               | 58                       | 66                         | 58-90                                              |
| Information was<br>trustworthy   | 89                   | 69                              | 73                | 78               | 61                       | 68                         | 61-89                                              |
| <b>Likeability</b>               |                      |                                 |                   |                  |                          |                            |                                                    |
| Liked a lot or a<br>little       | 87                   | 59                              | 66                | 70               | 64                       | 84                         | 59-87                                              |

|                                                                 |    |    |    |    |    |    |       |
|-----------------------------------------------------------------|----|----|----|----|----|----|-------|
| <b>Perceived impact</b>                                         |    |    |    |    |    |    |       |
| Information will help me make better choices                    | 91 | 77 | 68 | 86 | 71 | 63 | 63-91 |
| <b>Motivational appeal</b>                                      |    |    |    |    |    |    |       |
| Would play more lessons in the program if available             | 63 | 40 | 38 | 35 | 42 | 51 | 35-63 |
| Would recommend to a classmate                                  | 66 | 41 | 41 | 37 | 43 | 61 | 37-66 |
| As much or more fun than other lessons at school                | 82 | 66 | 62 | 67 | 74 | 87 | 62-87 |
| As much or more fun than other health lessons at school         | 79 | 71 | 64 | 61 | 74 | 75 | 61-79 |
| As much or more fun than other computer-based lessons at school | 85 | 66 | 66 | 57 | 71 | 79 | 57-85 |
| As much or more fun than favorite video game                    | 48 | 35 | 33 | 25 | 42 | 61 | 25-61 |
